# Supplementary material for: Geschlechtliche Vielfalt erfassen
Source: Springer Nature journal article supplement (doi:10.1007/s41906-022-1960-y), 2022-11-01
Supplement: MOESM1 [file 23716698]

## Literatur

### zum Beitrag „Geschlechtliche Vielfalt erfassen“

von Sophie Horstmann und Gabriele Bolte

*PflegeZeitschrift* (75) 12/2022, S. 52-54

Bauer GR, Braimoh J, Scheim A I, Dharma C (2017) Transgender-Inclusive Measures of Sex/Gender for Population Surveys: Mixed-Methods Evaluation and Recommendations. *PLoS ONE* (12) 1–28

Bolte G, Jacke K, Groth K, Kraus U, Dandolo L, Fiedel L, Debiak M, Kolossa-Gehring M, Schneider A, Palm K (2021) Integrating Sex/Gender into Environmental Health Research: Development of a Conceptual Framework. *IJERPH* (18) 1–18

Donnelly K, Twenge J M (2017) Masculine and Feminine Traits on the Bem Sex-Role Inventory, 1993–2012: A Cross-Temporal Meta-Analysis. *Sex. Roles* (76) 556–565

Döring N (2013) Zur Operationalisierung von Geschlecht im Fragebogen: Probleme und Lösungsansätze aus Sicht von Mess-, Umfrage-, Gender- Und Queer-Theorie. *GENDER* (2) 94–113

Fiedel L, Jacke K, Palm K (2018) Gendertheoretisch informierte Gesundheitswissenschaften – Herausforderungen, Potentiale und Beispiele ihrer transdisziplinären Entwicklung. *ZDfm* (2) 142–156

Horstmann S, Schmechel C, Palm K, Oertelt-Prigione S, Bolte G (2022) The Operationalisation of Sex and Gender in Quantitative Health-Related Research: A Scoping Review. *Int. J. Environ. Res. Public Health* (19) 1-21. Der vorliegende Artikel ist eine Zusammenfassung dieser Publikation

Johnson J L, Repta R (2012) Sex and Gender: Beyond the Binaries. In *Designing and Conducting Gender, Sex & Health Research*. SAGE, Thousand Oaks, CA, USA, S. 17–38

Pelletier R, Ditto B, Pilote L (2015) A Composite Measure of Gender and Its Association With Risk Factors in Patients With Premature Acute Coronary Syndrome. *Psychosom. Med.* (77) 517–526

Schellenberg D, Kaiser A (2018) The sex/gender distinction: Beyond f and m. In: C. B. Travis, J W. White, A. Rutherford, W. S. Williams, S. L. Cook, K. F. Wyche (Eds.) *APA handbook of the psychology of women: History, theory and battlegrounds*. S. 165–187

Tate C C, Ledbetter J N, Youssef C P (2013) A Two-Question Method for Assessing Gender Categories in the Social and Medical Sciences. *J. Sex Res.* (50) 767–776
